# Supplementary material for: Using machine learning to construct TOMCAT model and occultation measurement-based stratospheric methane (TCOM-CH4) and nitrous oxide (TCOM-N2O) profile data sets
Source: Copernicus journal article supplement (doi:10.5194/essd-15-5105-2023), 2023-11-24
Supplement: Supplementary file 1 [file essd-15-5105-2023-supplement.pdf]

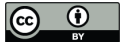

*Supplement of*

**Using machine learning to construct TOMCAT model and occultation measurement-based stratospheric methane (TCOM-CH<sub>4</sub>) and nitrous oxide (TCOM-N<sub>2</sub>O) profile data sets**

**Sandip S. Dhomse and Martyn P. Chipperfield**

*Correspondence to:* Sandip S. Dhomse ([s.s.dhomse@leeds.ac.uk](mailto:s.s.dhomse@leeds.ac.uk))

The copyright of individual parts of the supplement might differ from the article licence.

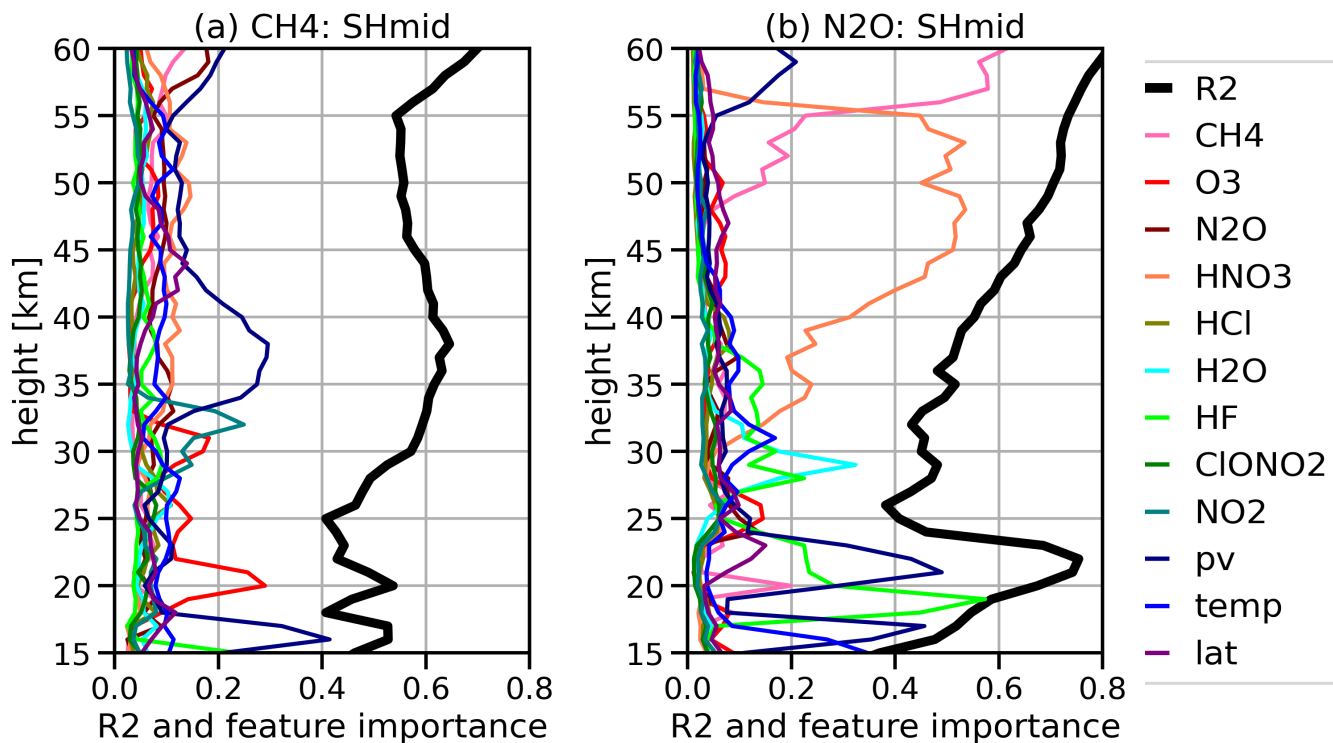

**Figure S1.** Vertical profiles of the variance ( $R^2$ ) and feature importances estimated by XGBoost regression models for the TOMCAT-observation differences for (a) CH<sub>4</sub> (1991-2018) and (b) N<sub>2</sub>O (2004-2018, ACE only) for the South Hemisphere mid-latitude (SHmid, 20°S–70°S) latitude bin. See equation 1 and subsequent information in the manuscript about the features (total 13) or variables used in the XGBoost regression model.

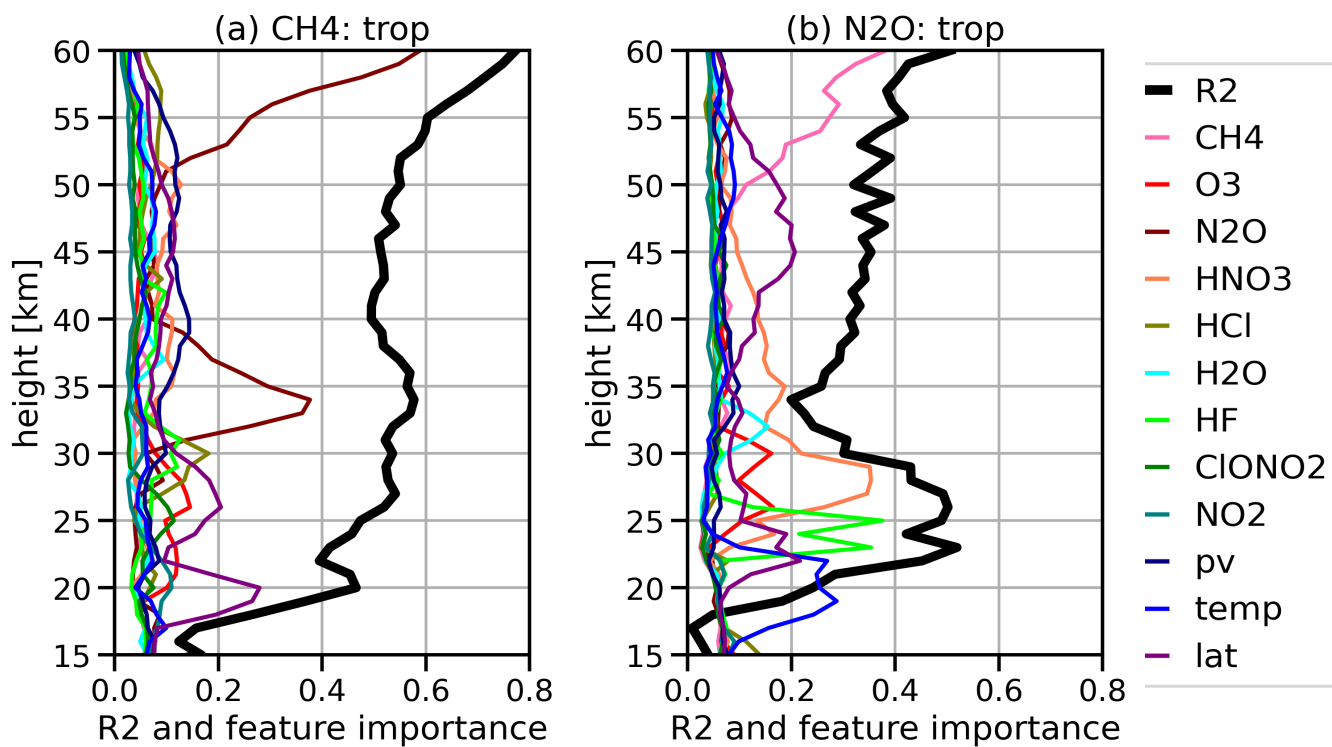

**Figure S2.** Same as S1, but for tropical latitude band (40° S–40° N)

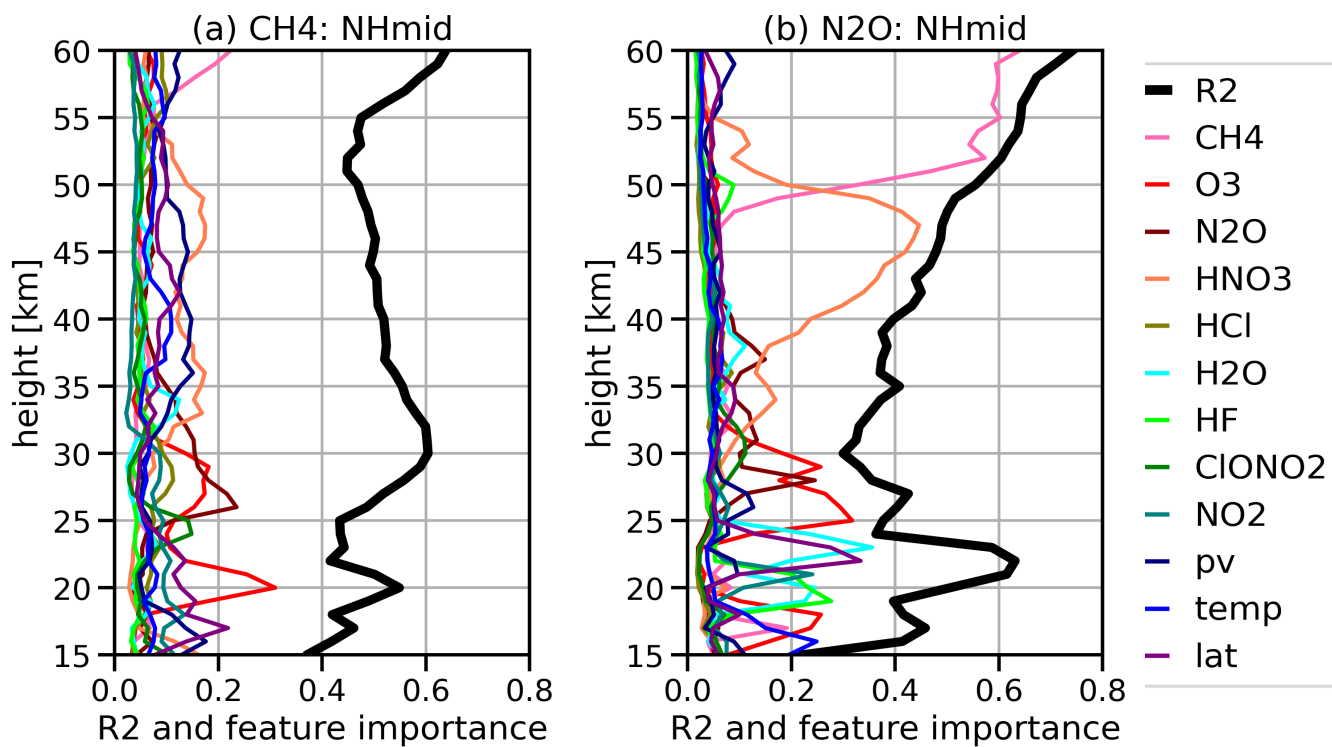

**Figure S3.** Same as S1, but for northern hemisphere mid-latitude (NHmid) band (20°N–70°N)



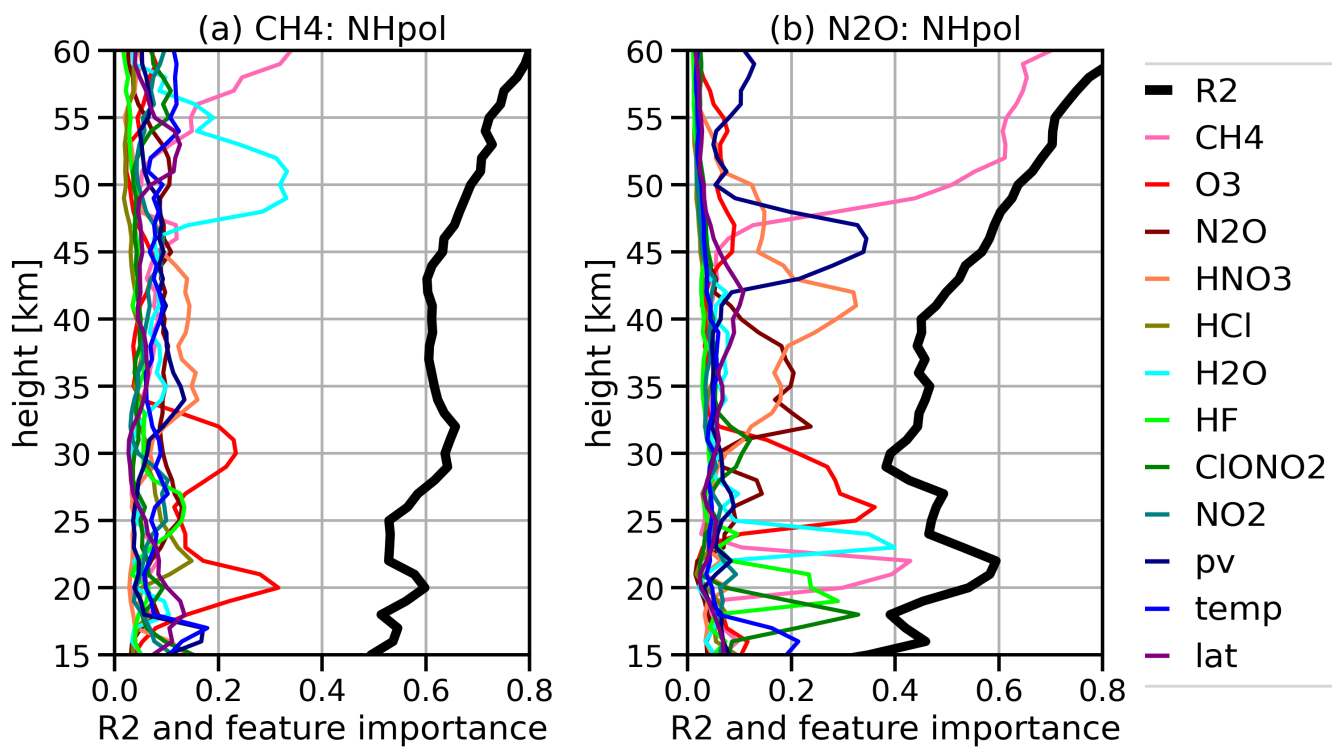

**Figure S4.** Same as S1, but for northern hemisphere polar (NHPol) latitude band (50°N–90°N)

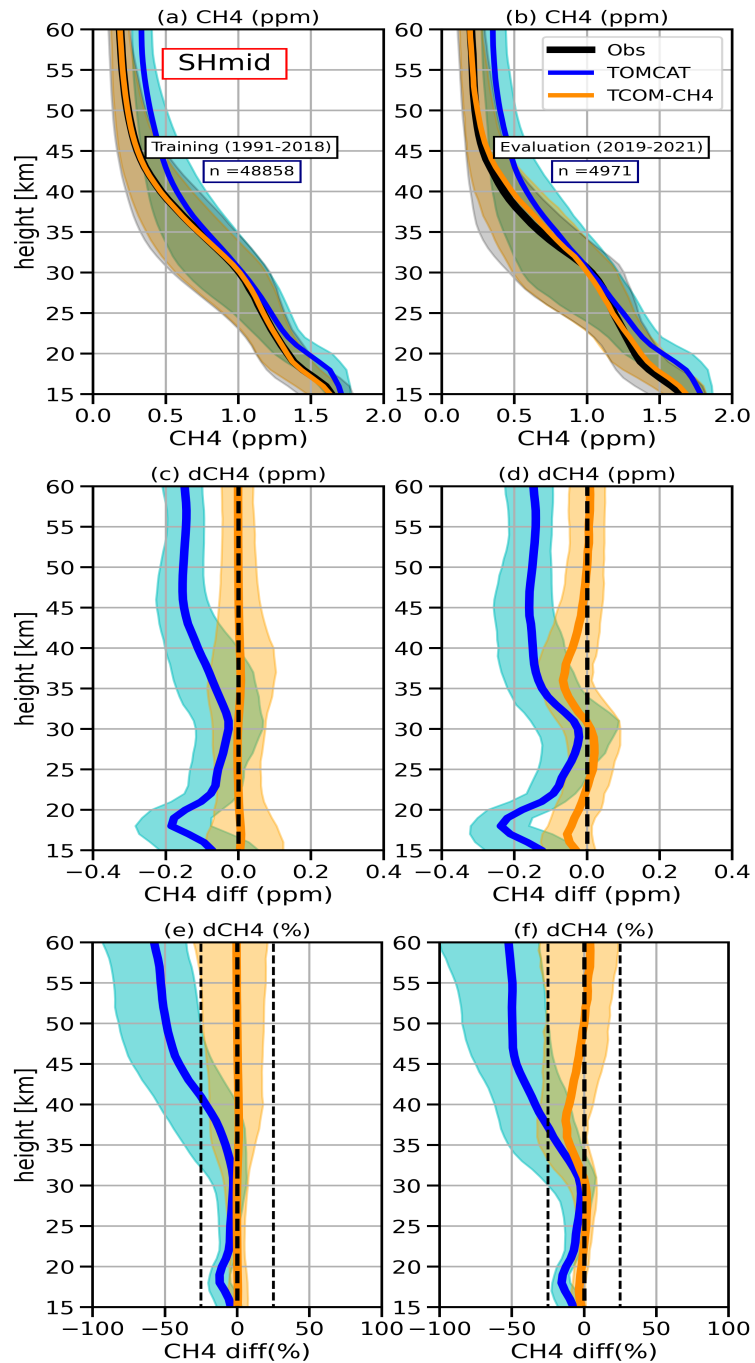

**Figure S5.** Panels (a) and (b). Comparison between TOMCAT (blue), TCOM-CH4 (orange) and satellite measurement-based (black) CH<sub>4</sub> profiles for SHmid (20°S–70°S) latitude band. Solid lines indicate median profiles while shaded regions show 10th and 90th percentile range. Comparisons are shown for training (1992-2018) and evaluation (2019-2021) periods in panels (a, left) and (b, right), respectively. Panels (c) - (f). Differences between TOMCAT and TCOM-CH4 w. r. t. satellite data sets in absolute units (ppm) and percent. Right (c and e) and left (d and f) panels show differences for the training (1992-2018) and evaluation (2019-2021) periods.

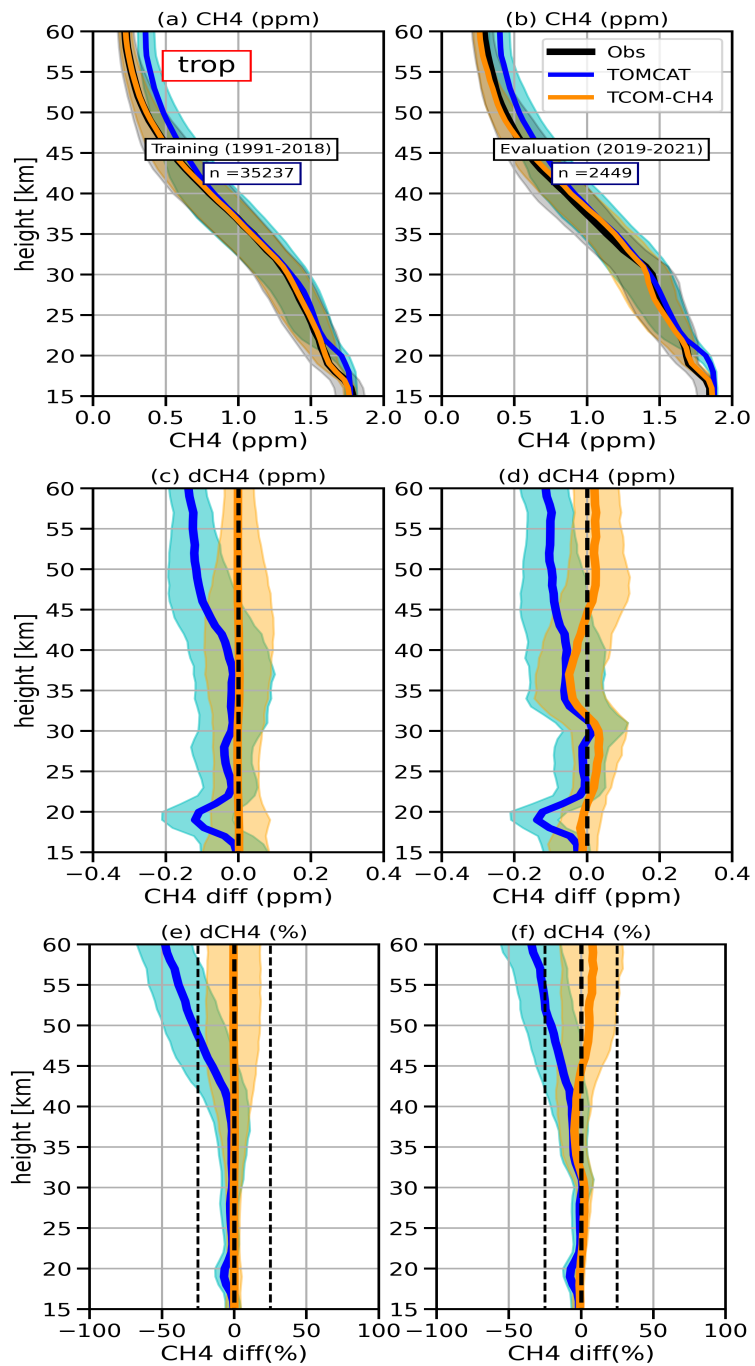

**Figure S6.** Same as S5, but for tropical (trop) latitude band (40°S–40°N)

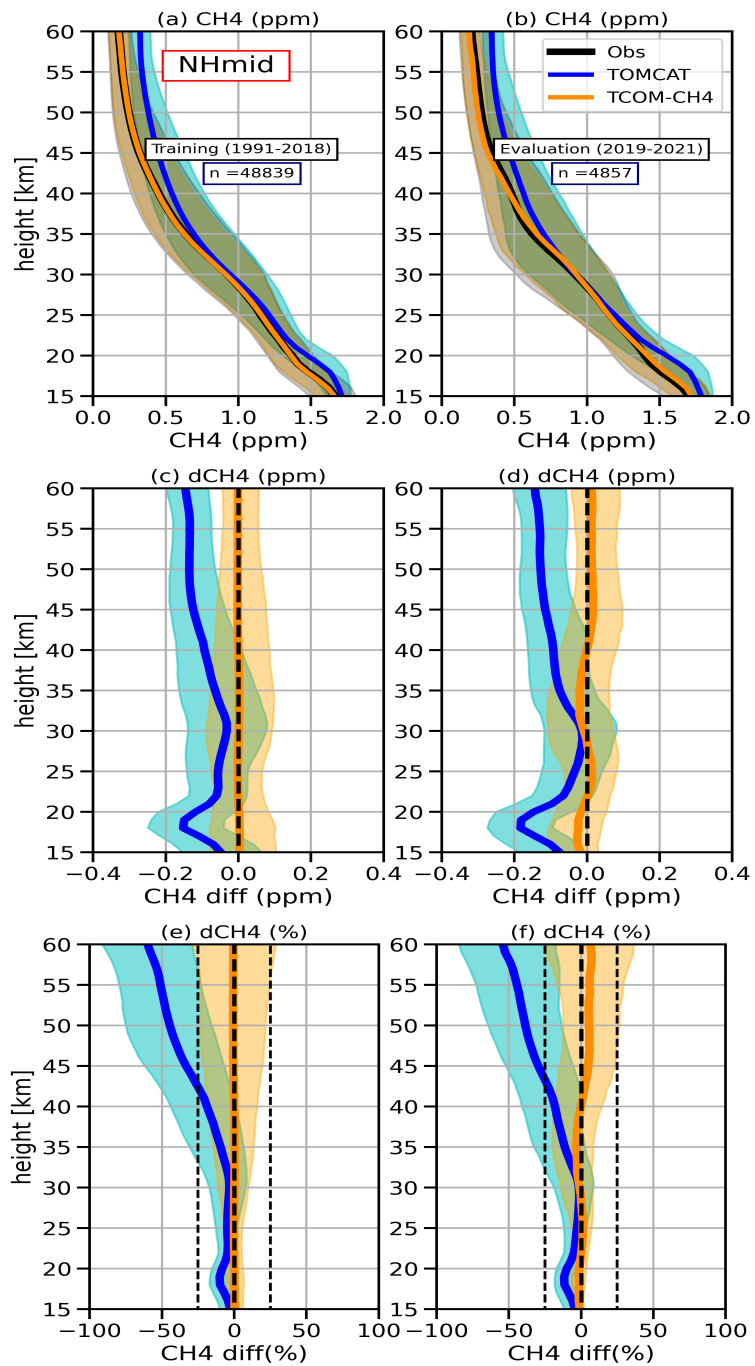

**Figure S7.** Same as S5, but for northern hemisphere mid-latitude (NHmid) band (20°N–70°N)

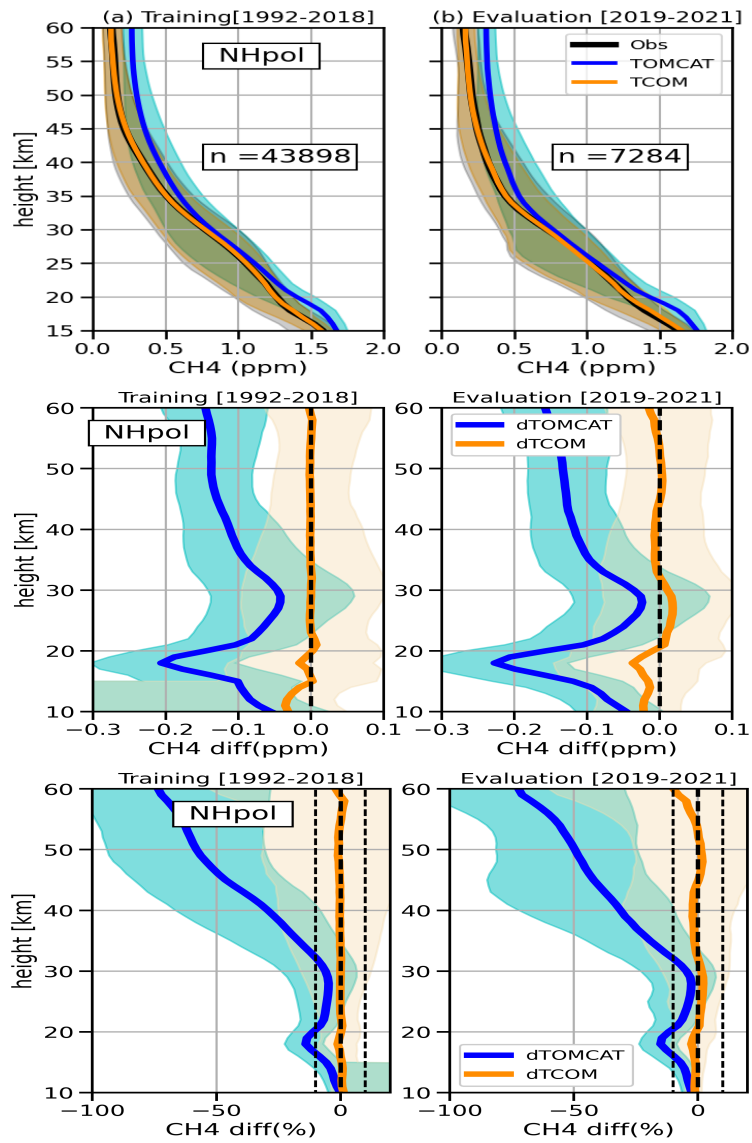

**Figure S8.** Same as S5, but for northern hemisphere polar-latitude (NHpol) band (50°N-90°N)

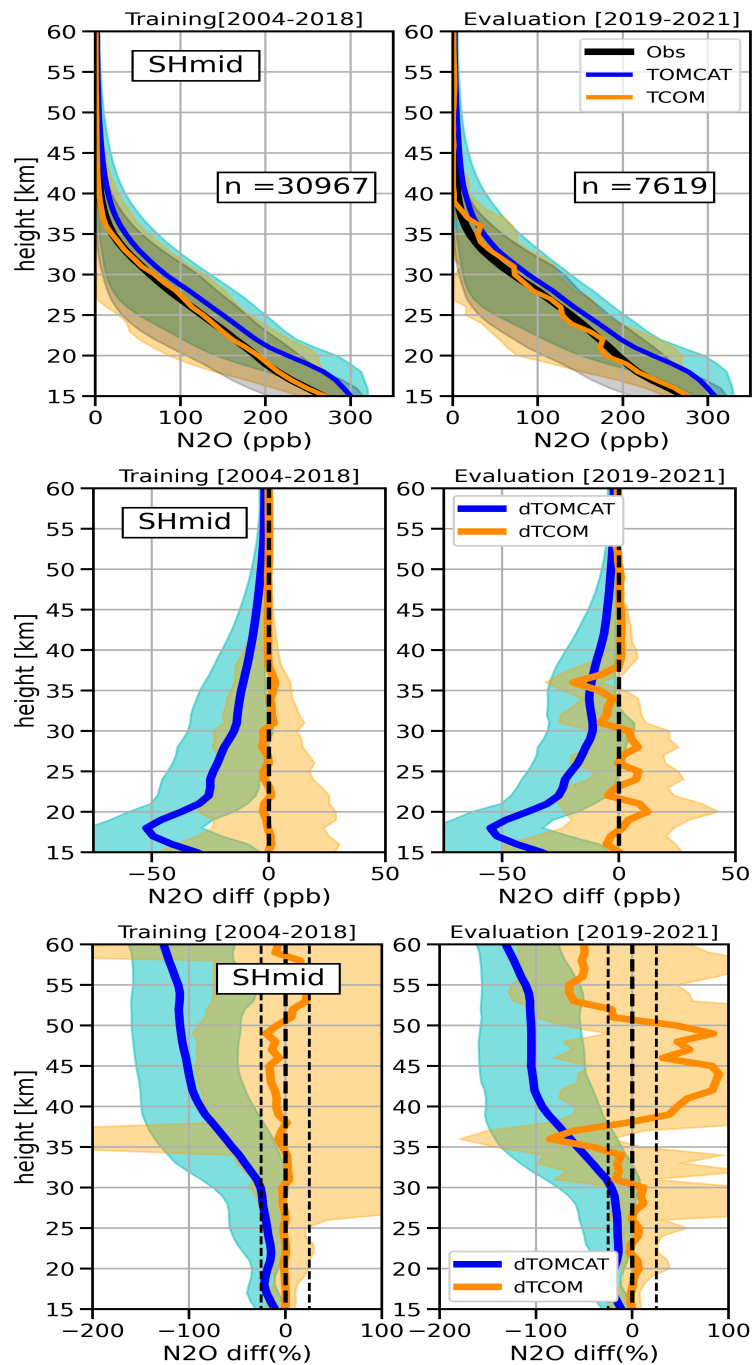

**Figure S9.** Panels (a) and (b). Comparison between TOMCAT (blue), TCOM-N<sub>2</sub>O (orange) and ACE-FTS satellite (black) N<sub>2</sub>O profiles measurements for SHmid (20°S–70°S) latitude band. Solid lines indicate median profiles while shaded regions show 10th and 90th percentile range. Comparisons are shown for training (1992-2018) and evaluation (2019-2021) periods in panels (a, left) and (b, right), respectively. Panels (c) - (f). Differences between TOMCAT and TCOM-N<sub>2</sub>O w. r. t. satellite data sets in absolute units (ppm) and percent. Right (c and e) and left (d and f) panels show differences for the training (1992-2018) and evaluation (2019-2021) periods.

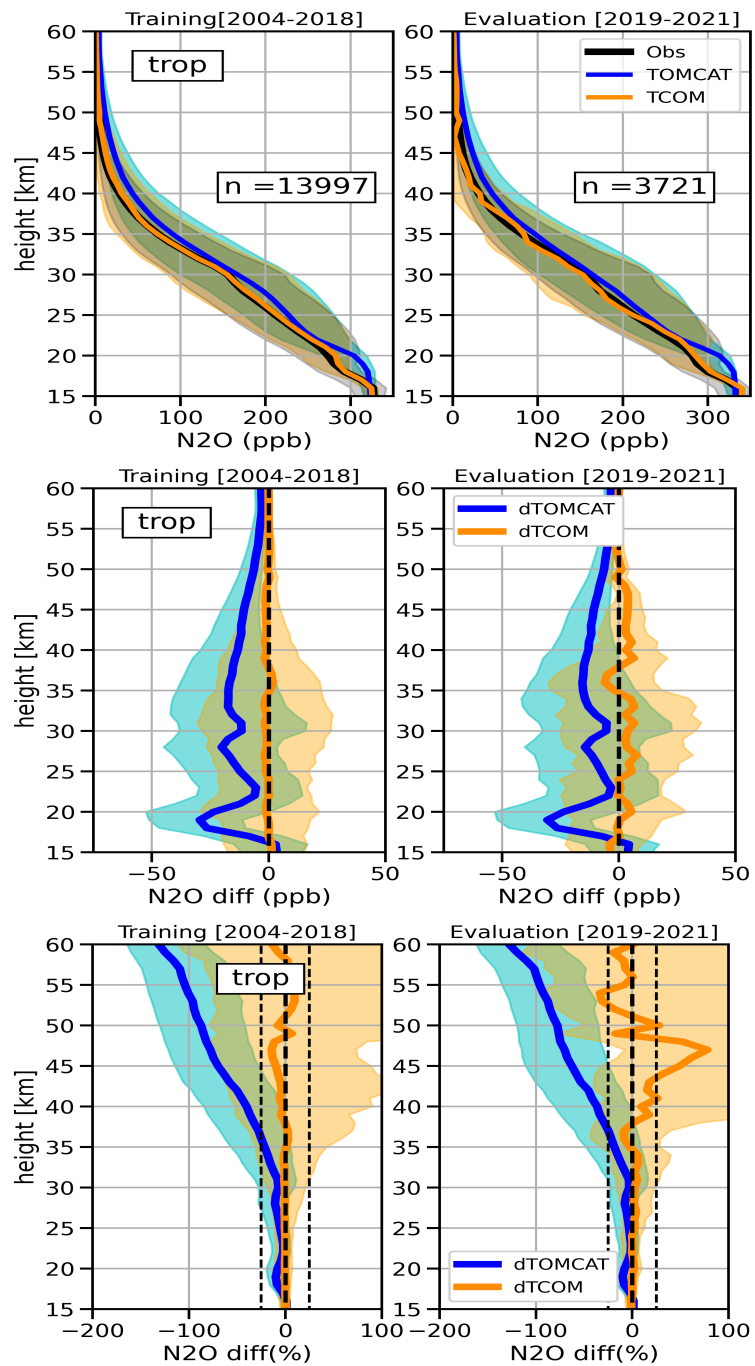

**Figure S10.** Same as S9, but for tropical (trop) latitude band (40°S–40°N)

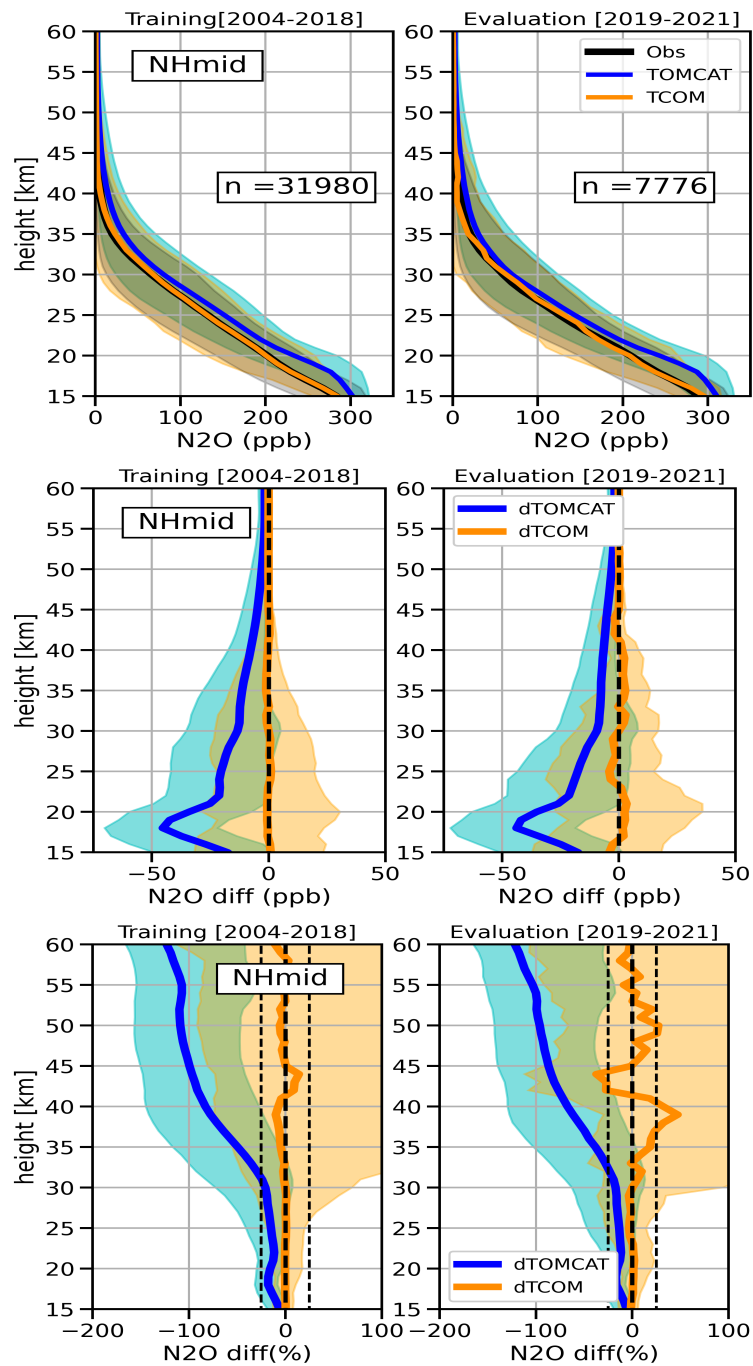

**Figure S11.** Same as S9, but for northern hemisphere mid-latitude (NHmid) band (20°N–70°N)



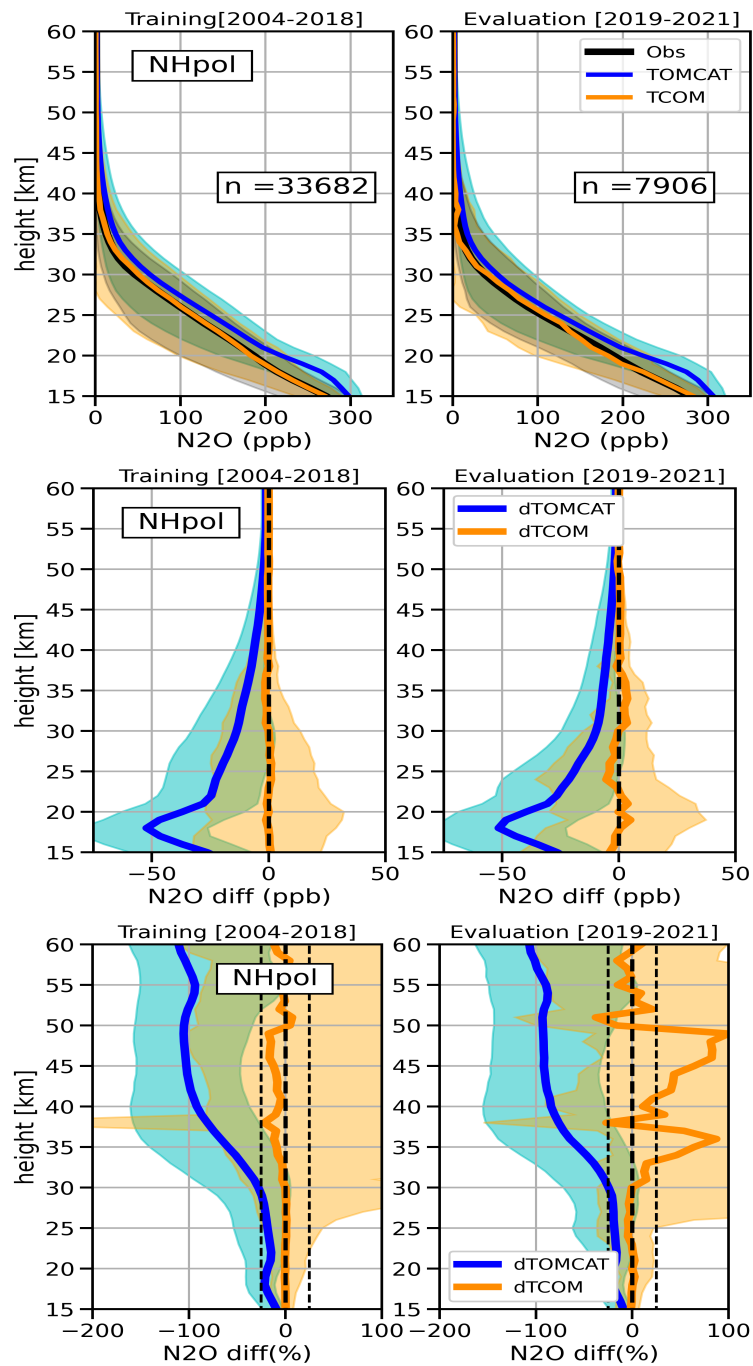

**Figure S12.** Same as S9, but for northern hemisphere polar-latitude (NHpol) band (50°N–90°N)

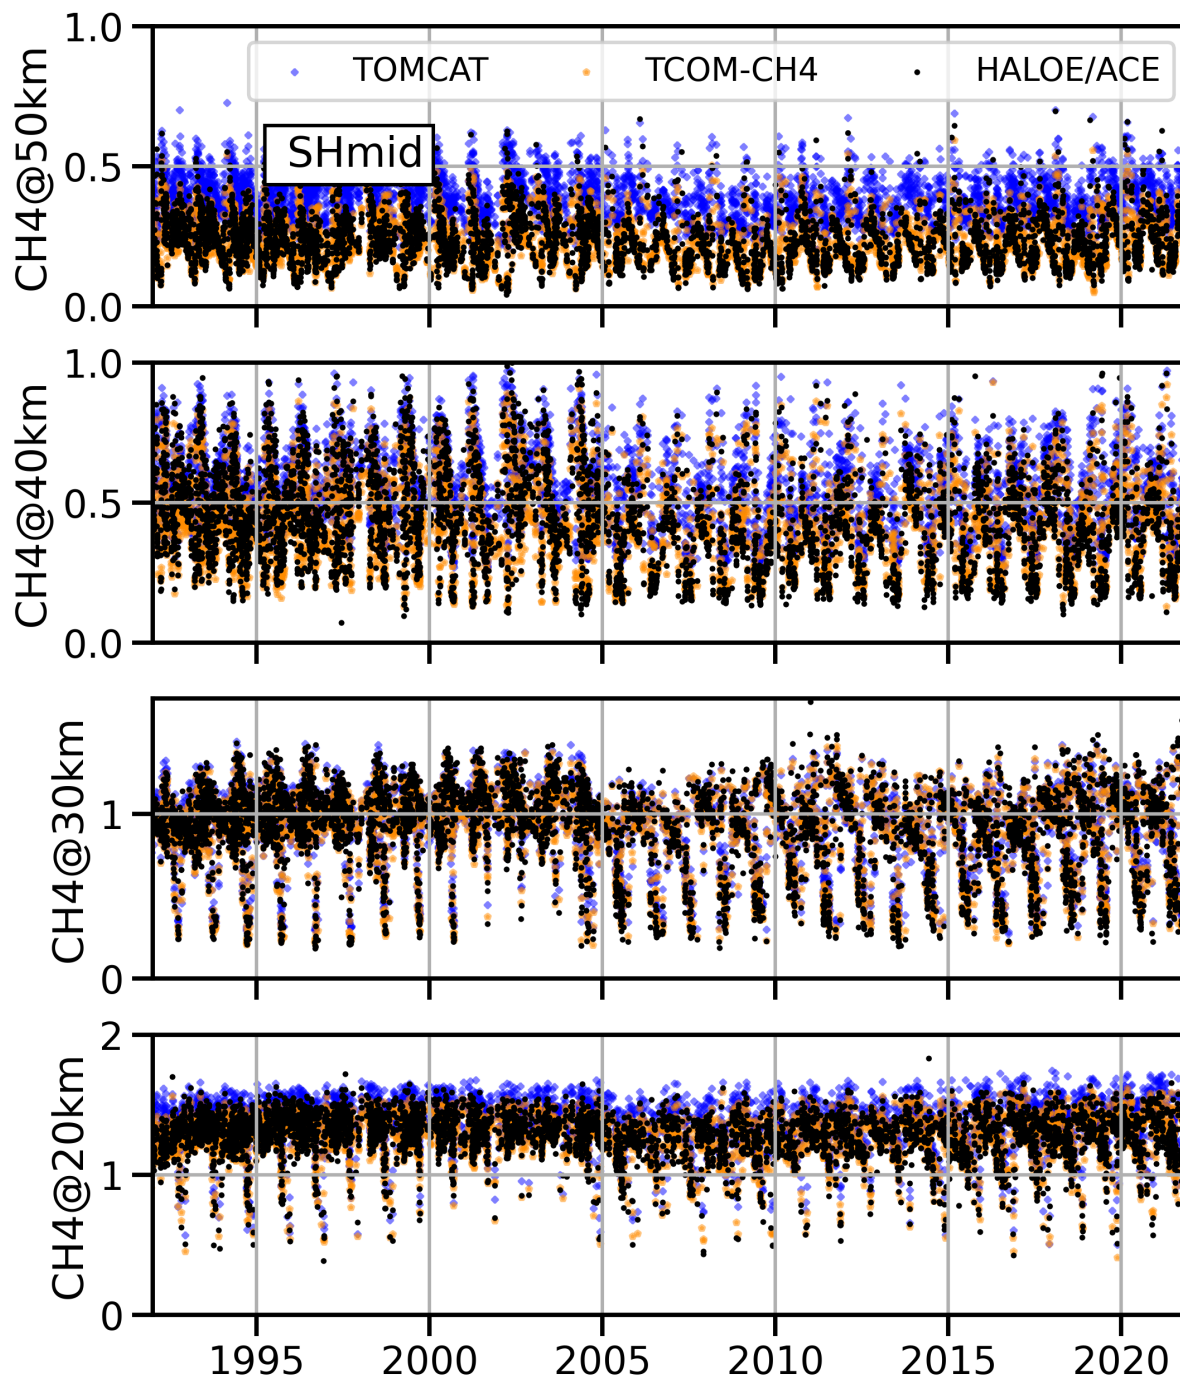

**Figure S13.** Time evolution (1992–2021) of CH<sub>4</sub> from TOMCAT (blue crosses), TCOM-CH<sub>4</sub> (orange diamonds) and satellite data (black dots) for SHmid (20°S–70°S) at 20, 30, 40 and 50 km. Note that for clarity only 10% (every 10th) of data points are shown and due to sharp gradient in vertical distribution, the y axis range varies between the panels.

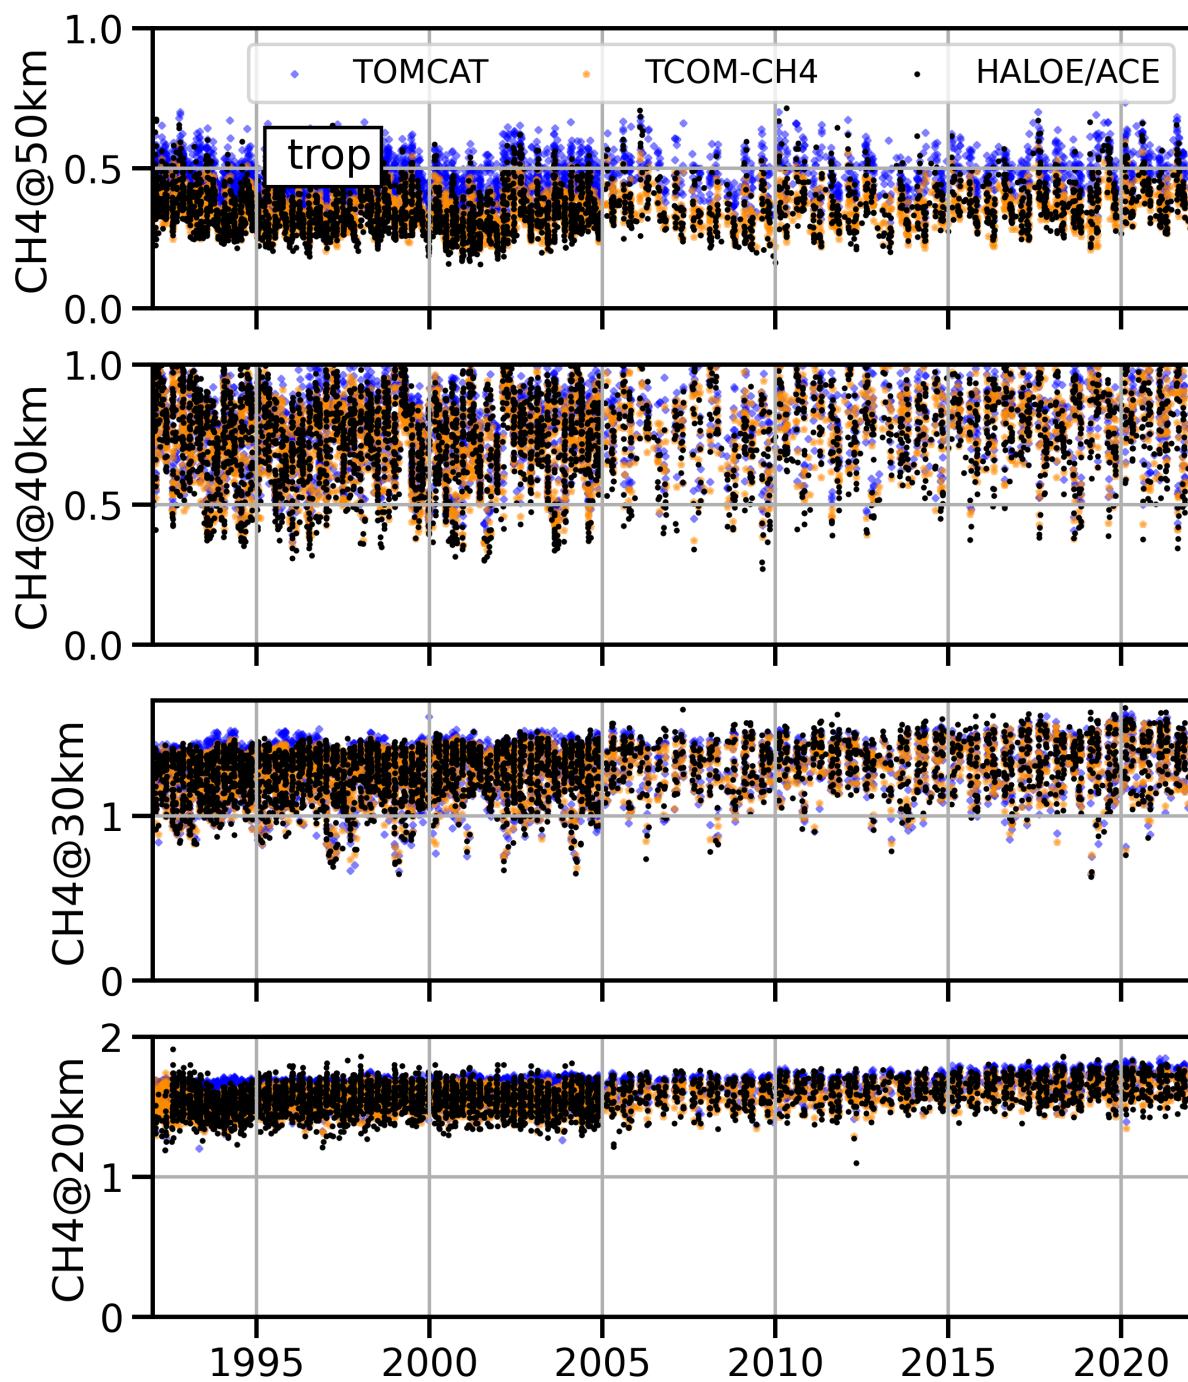

**Figure S14.** Same as S13, but for tropical (trop) latitude band (40°S–40°N)

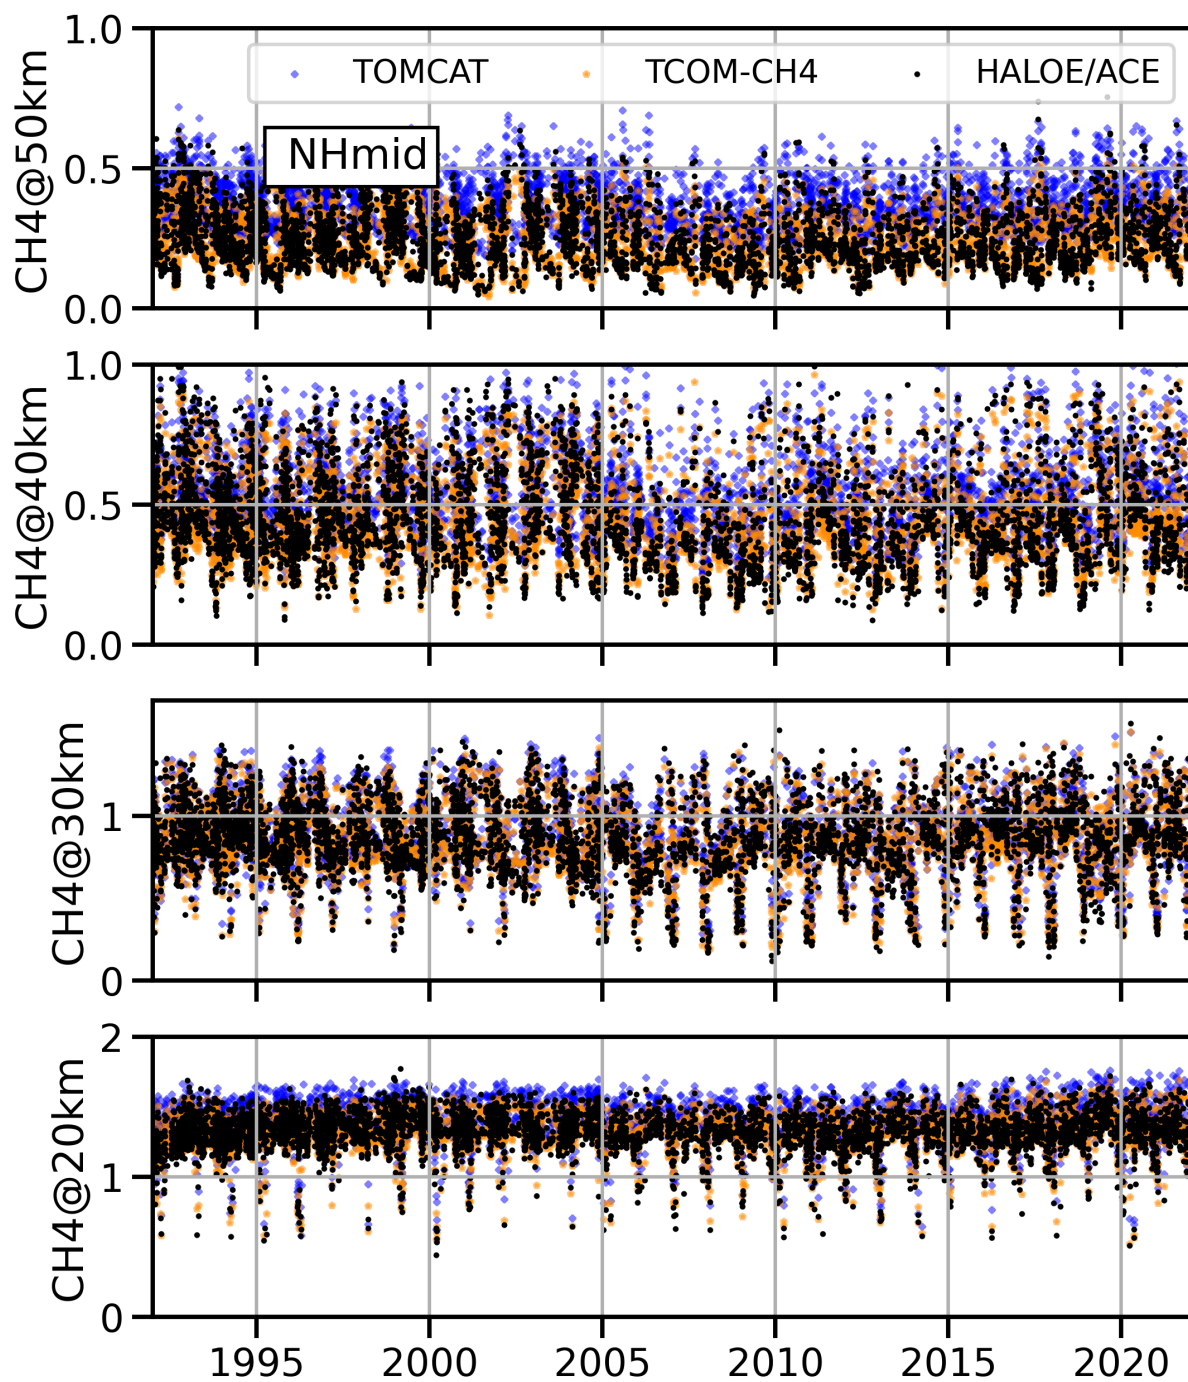

**Figure S15.** Same as S13, but for northern hemisphere mid-latitude (NHmid) band (20°N–70°N)



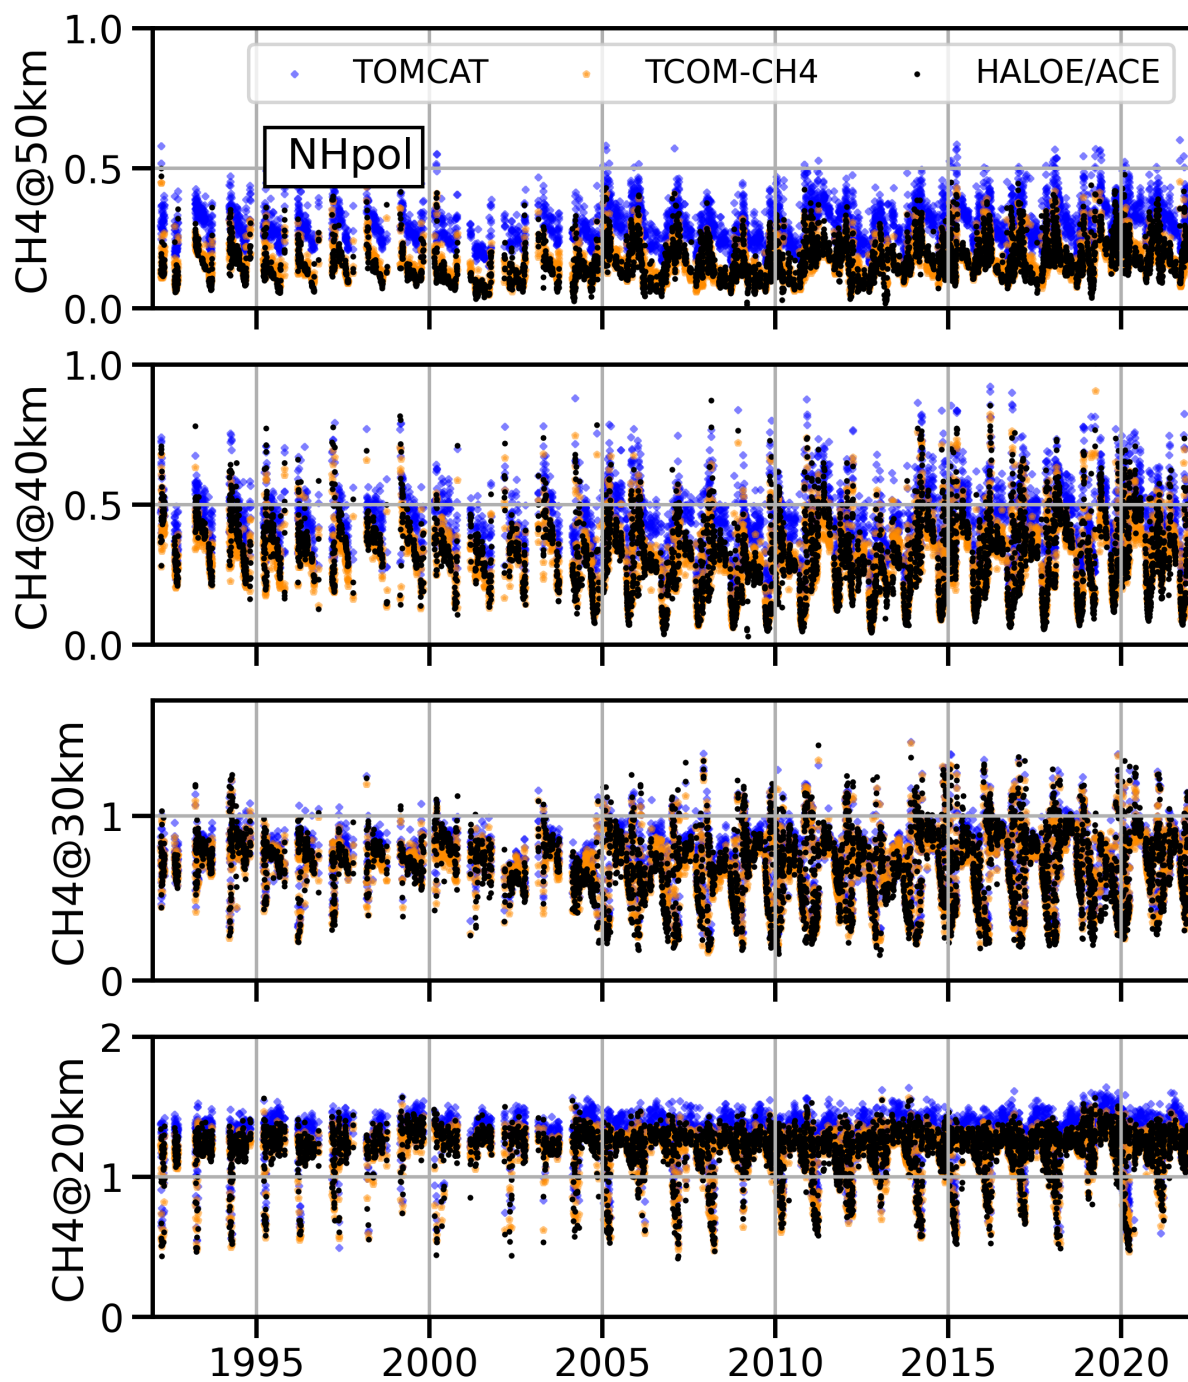

**Figure S16.** Same as S13, but for northern hemisphere polar-latitude (NHpol) band (50°N–90°N)

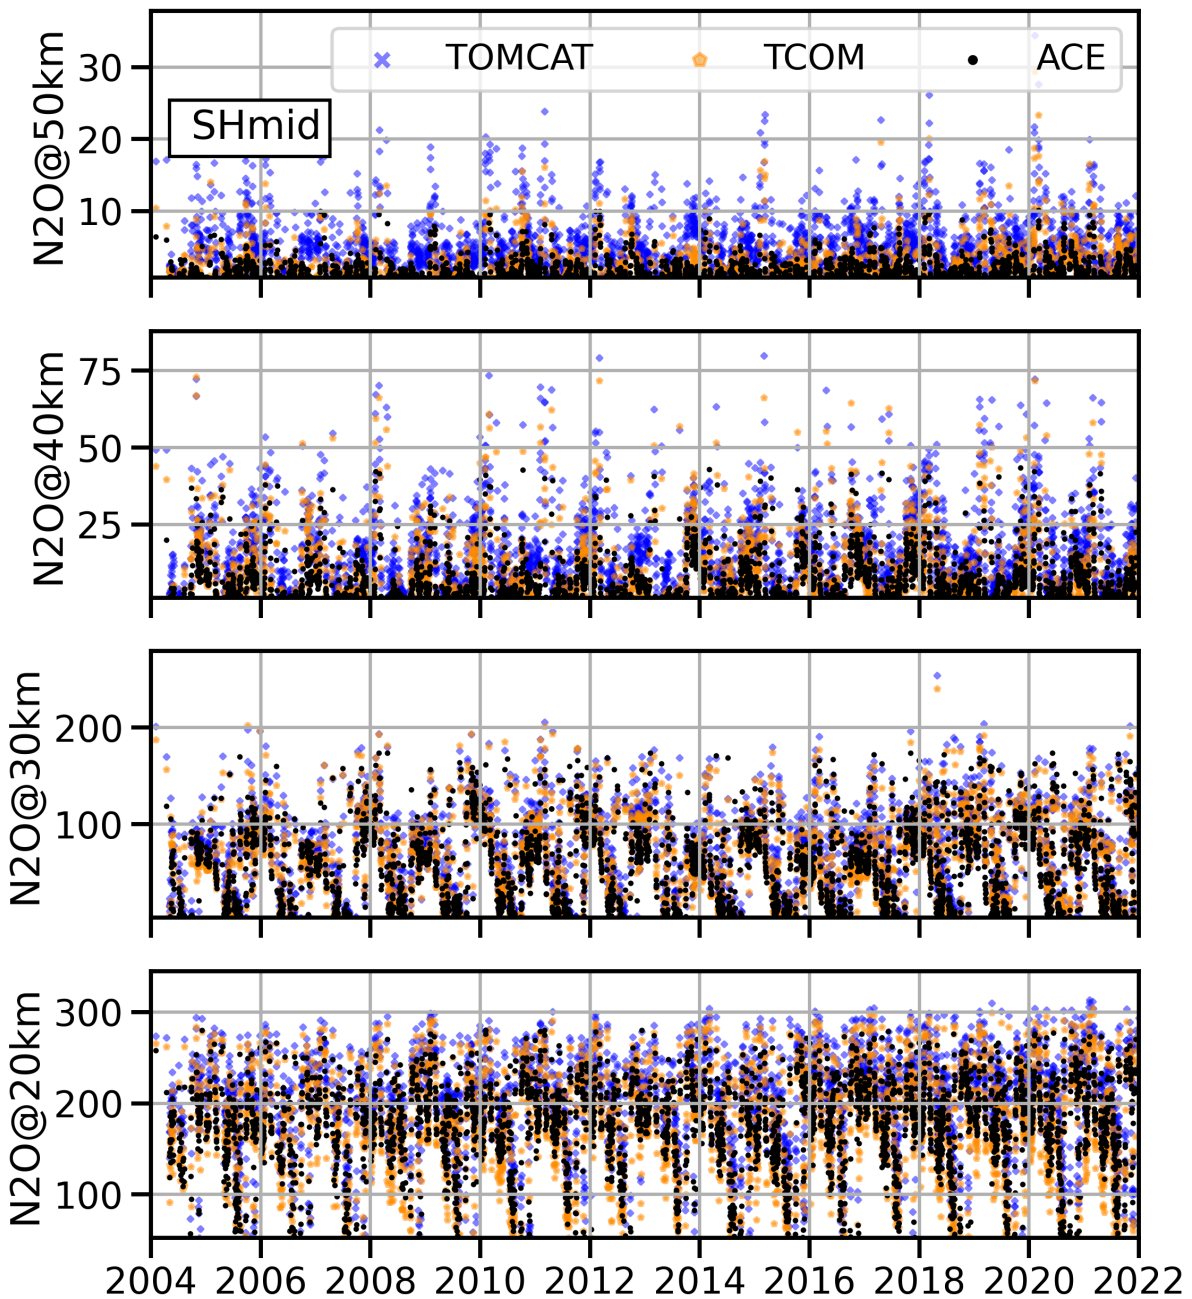

**Figure S17.** Time evolution (1992-2021) of  $\text{CH}_4$  from TOMCAT (blue crosses), TCOM- $\text{CH}_4$  (orange diamonds) and satellite data (black dots) for SHmid ( $20^\circ\text{S}$ – $70^\circ\text{S}$ ) at 20, 30, 40 and 50 km. Note that for clarity only 10% (every 10th) of data points are shown and due to sharp gradient in vertical distribution, the y axis range varies between the panels.

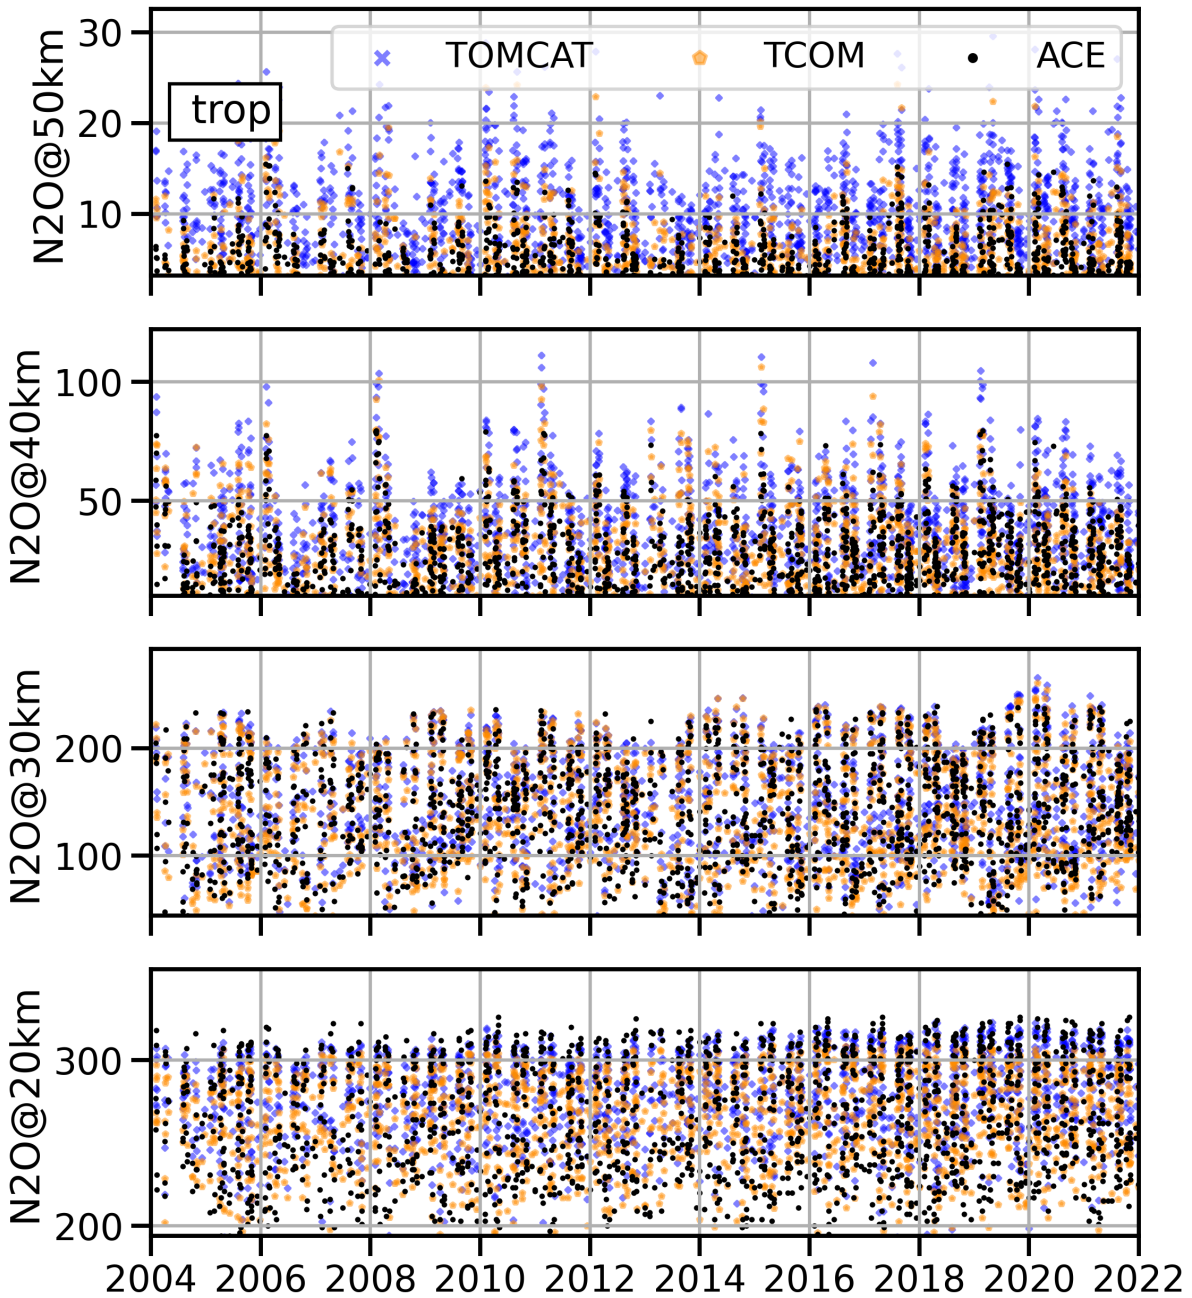

**Figure S18.** Same as S17, but for tropical (trop) latitude band (40°S–40°N)



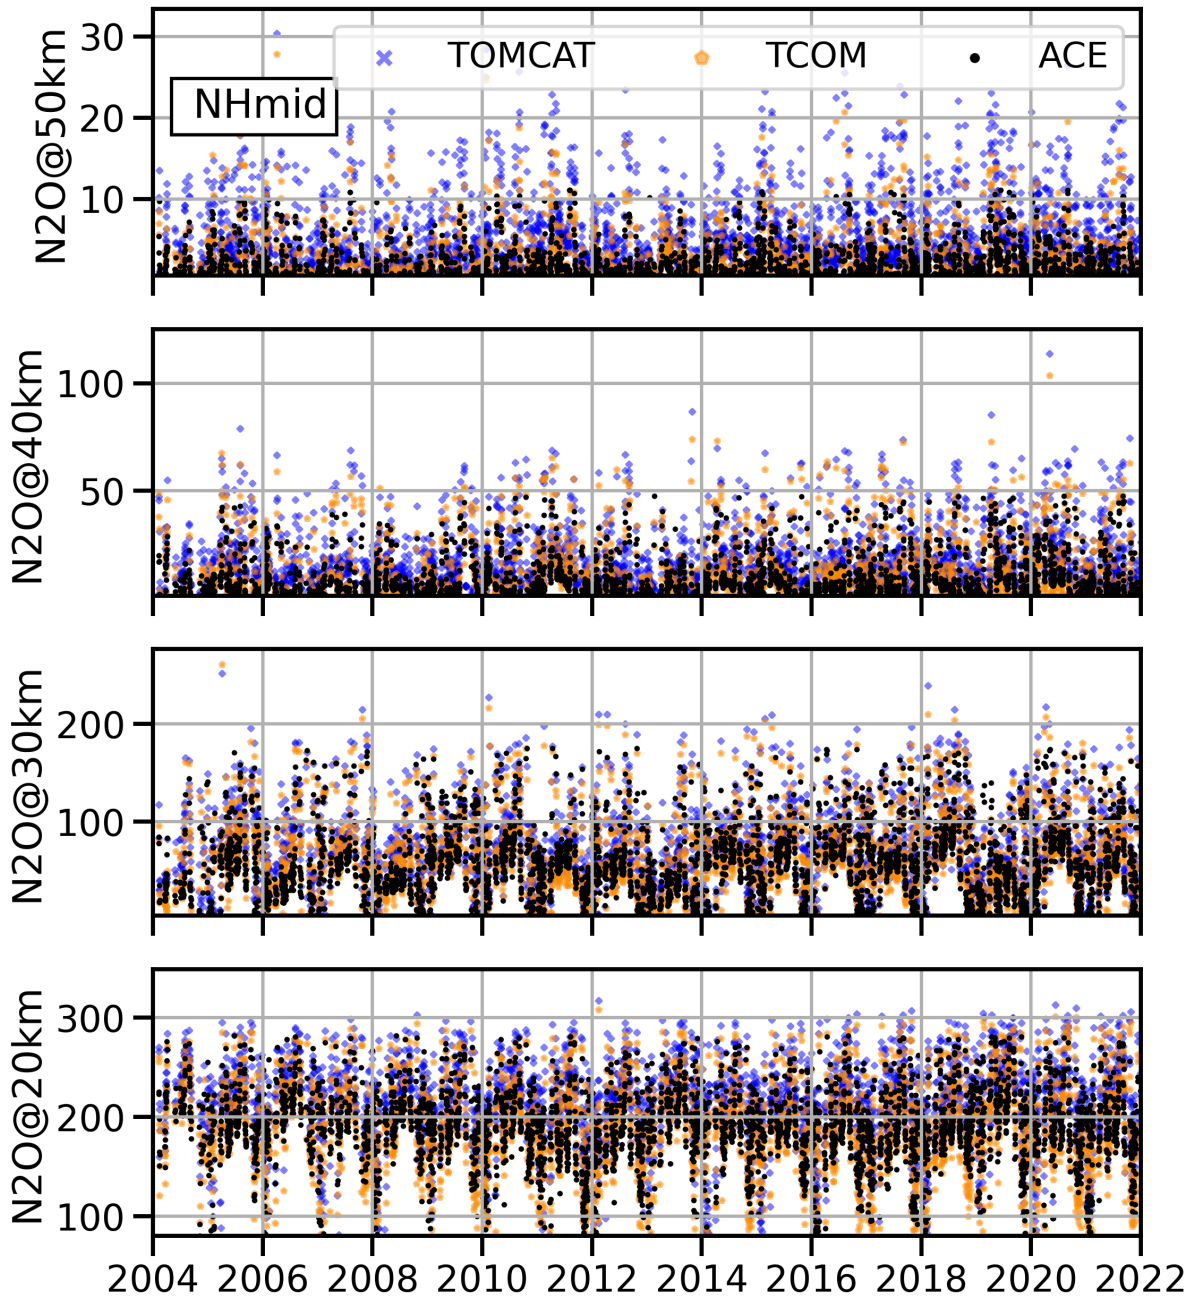

**Figure S19.** Same as S17, but for northern hemisphere mid-latitude (NHmid) band (20°N–70°N)



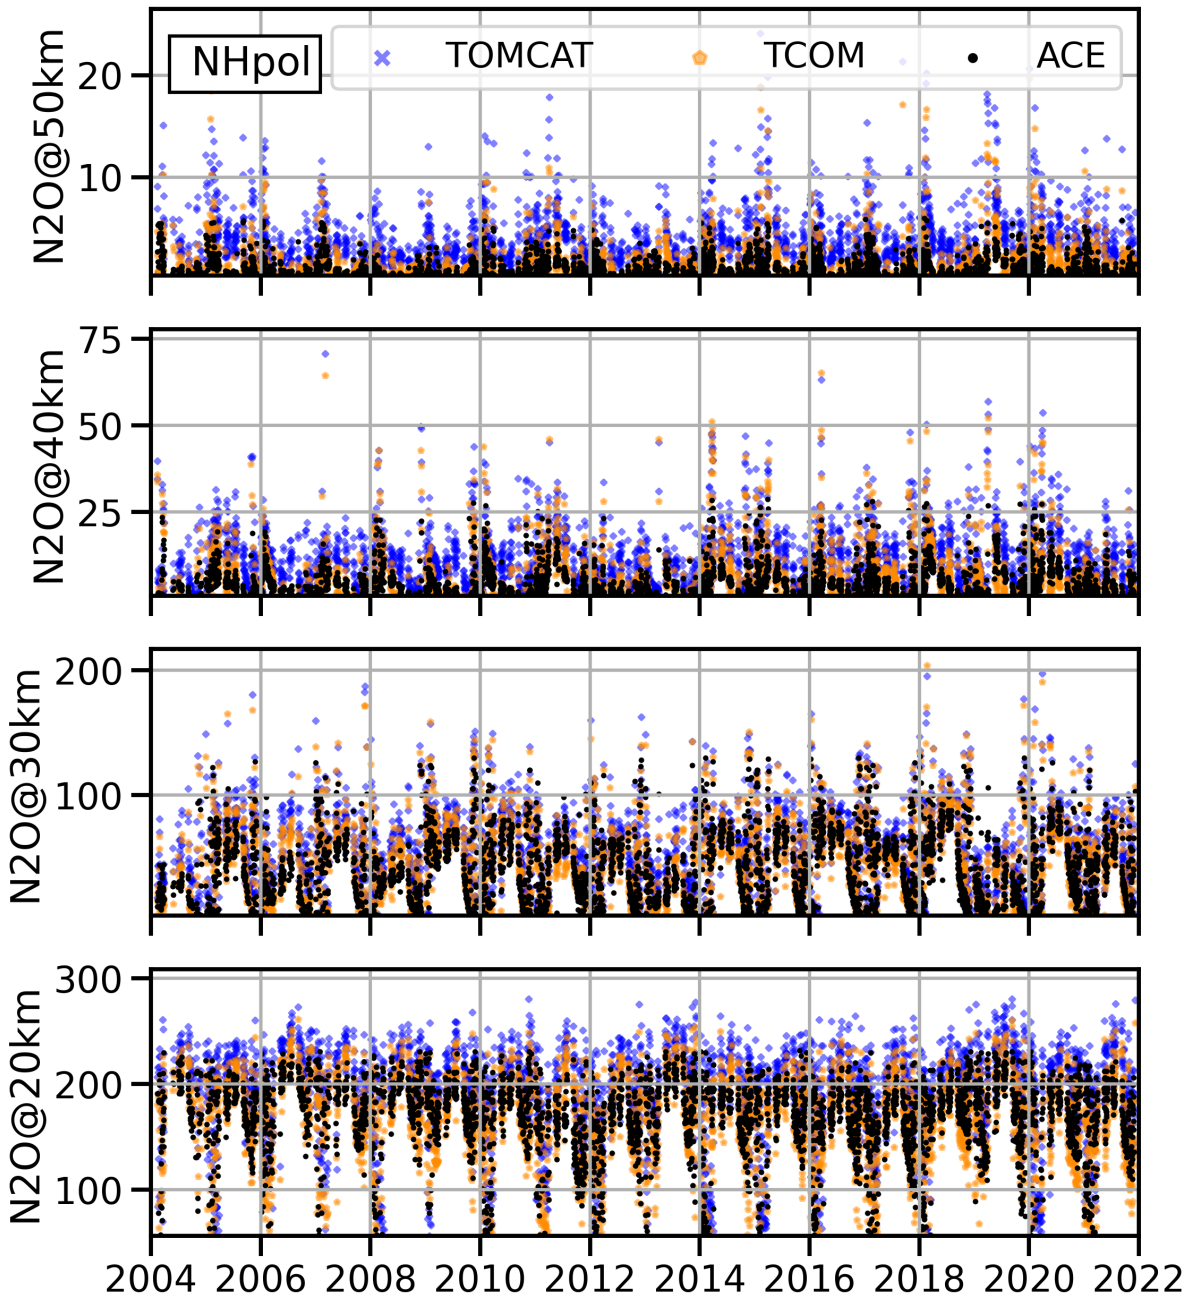

**Figure S20.** Same as S17, but for northern hemisphere polar-latitude (NHpol) band (50°N–90°N)
